# Supplementary material for: Capacitive deionization of NaCl solutions with ambient pressure dried carbon aerogel microsphere electrodes
Source: Royal Society of Chemistry journal article supplement (doi:10.1039/c7ra05226j), 2017-01-01
Supplement: c7ra05226j1.pdf [file c7ra05226j1.pdf]

## Electronic Supplementary Information

### Capacitive deionization of NaCl Solutions with ambient pressure

#### dried carbon aerogel microspheres electrodes

Xueping Quan<sup>a,b</sup>, Zhibing Fu<sup>b</sup>, Lei Yuan<sup>b</sup>, Minglong Zhong<sup>b</sup>, Rui Mi<sup>b</sup>, Xi Yang<sup>b</sup>, Yong Yi<sup>a,\*</sup>, and Chaoyang Wang<sup>b,\*</sup>

<sup>a</sup>School of Materials Science and Engineering, Southwest University of Science and Technology, Mianyang (Sichuan) 621000, China.

<sup>b</sup>Research Center of Laser Fusion, China Academy of Engineering Physics, Mianyang 621900, China.

\*correspondence to:

Author Yong Yi, E-mail: [yiyong@swust.edu.cn](mailto:yiyong@swust.edu.cn);

Author Chaoyang Wang, E-mail: [wangchy807@caep.cn](mailto:wangchy807@caep.cn);

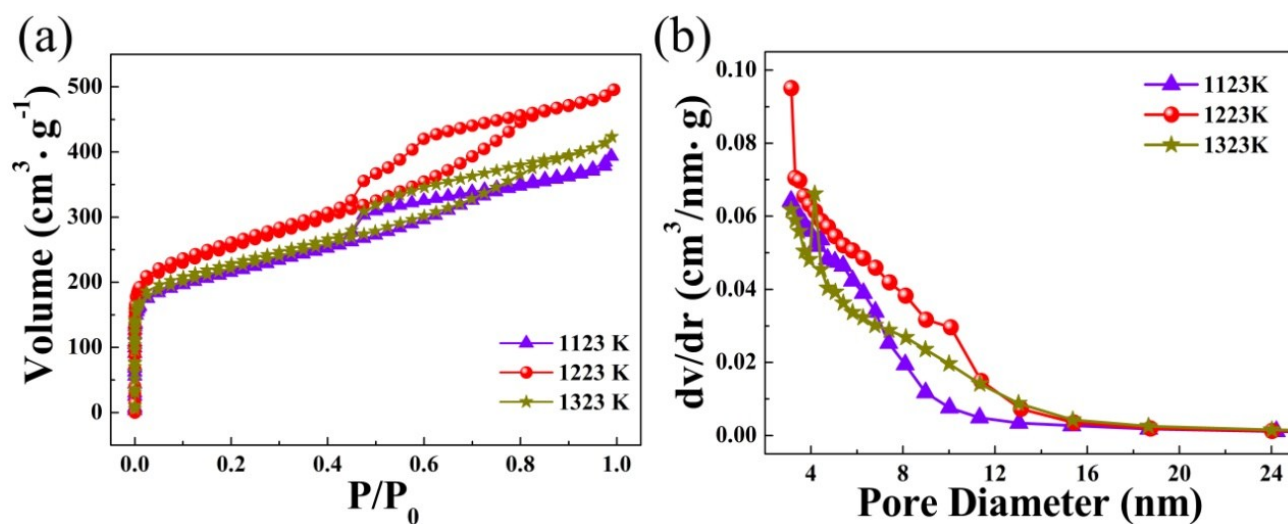

Fig.S1.(a) Adsorption isotherms at 77 K and (b) PSD of CA microspheres under different carbonized temperatures.

Table S1 Surface area characteristic of CA microspheres under different carbonized temperatures.

| Carbonization temperature (K) | S <sub>BET</sub> <sup>a</sup> (m <sup>2</sup> /g) | S <sub>meso</sub> <sup>b</sup> (m <sup>2</sup> /g) | V <sub>tot</sub> <sup>c</sup> (cm <sup>3</sup> /g) | V <sub>meso</sub> <sup>d</sup> (cm <sup>3</sup> /g) | Average pore diameter (nm) |
|-------------------------------|---------------------------------------------------|----------------------------------------------------|----------------------------------------------------|-----------------------------------------------------|----------------------------|
| 1123                          | 775                                               | 352                                                | 0.61                                               | 0.46                                                | 3.14                       |
| 1223                          | 910                                               | 398                                                | 0.77                                               | 0.60                                                | 3.38                       |
| 1323                          | 794                                               | 366                                                | 0.65                                               | 0.49                                                | 3.3                        |

<sup>a</sup> BET specific surface area.

<sup>b</sup> Mesoporous surface area derived from the t-plot method.

<sup>c</sup> Total volume of pores.

<sup>d</sup> Volume of mesopores.
